# Supplementary material for: Production, Fate and Pathogenicity of Plasma Microparticles in Murine Cerebral Malaria
Source: PubMed Central journal article supplement (PMC3961352; doi:10.1371/journal.ppat.1003839), 2014-03-20

MP Donor CM<sup>+</sup>

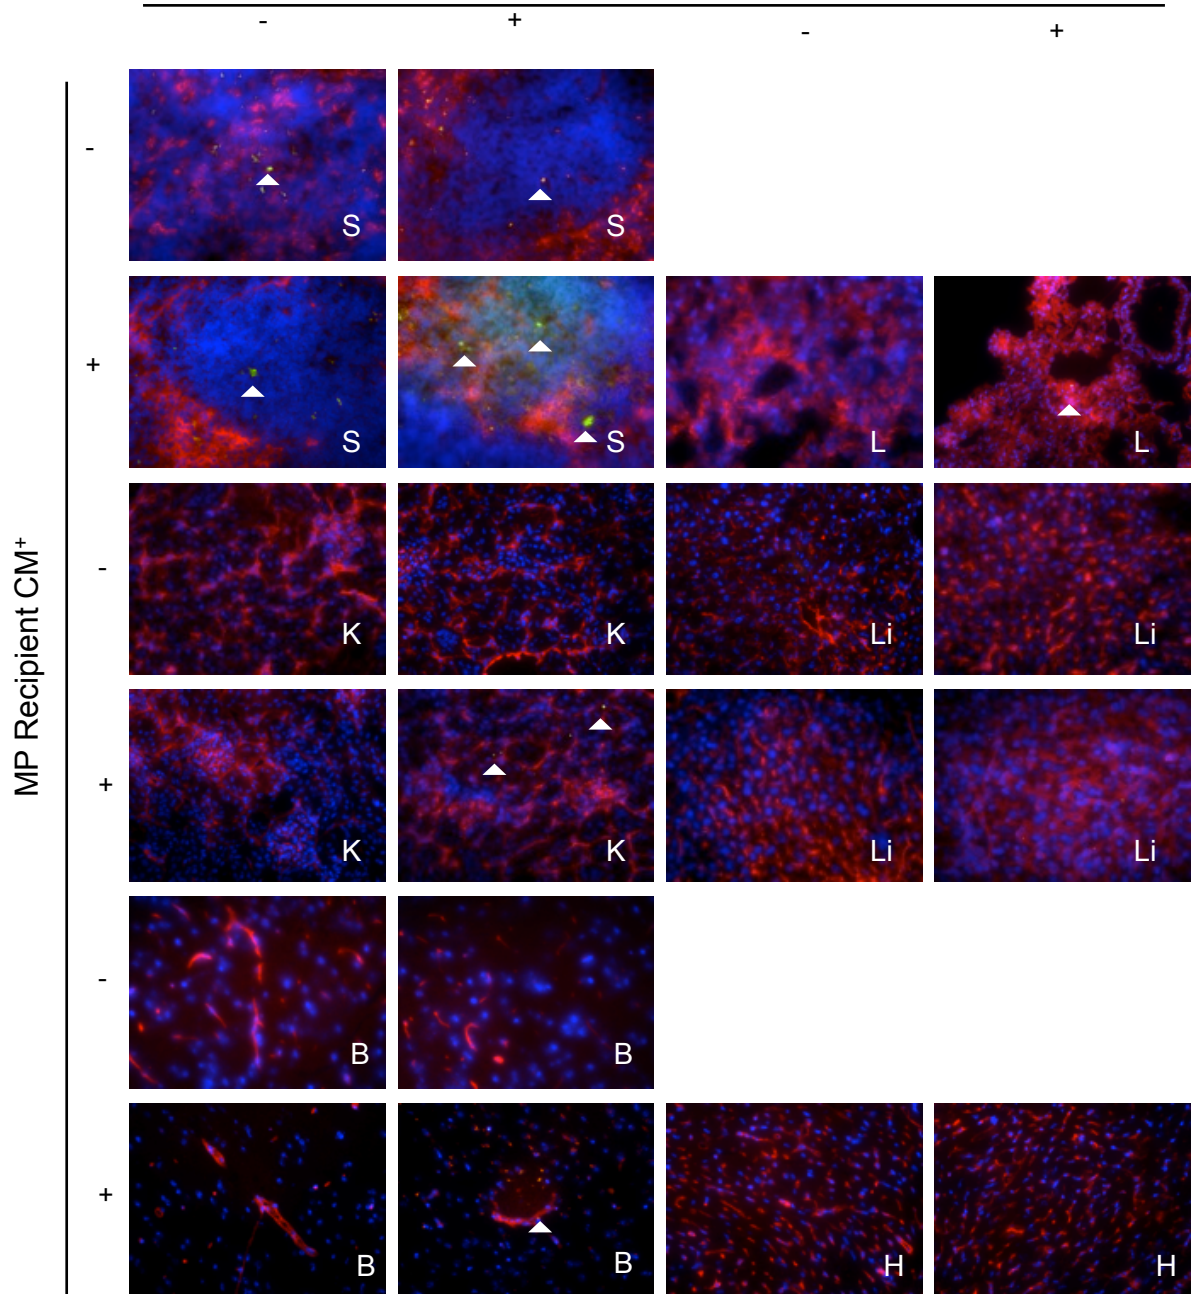

Supplement: ppat.1003839.s001.pdf [file ppat.1003839.s001.pdf]
